# Supplementary material for: Endothelial LATS2 is a suppressor of bone marrow fibrosis
Source: PubMed Central journal article supplement (PMC11324521; doi:10.1038/s44161-024-00508-x), 2024-07-29
Supplement: 44161_2024_508_MOESM1_ESM.pdf [file 44161_2024_508_MOESM1_ESM.pdf]

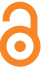

---

# Endothelial LATS2 is a suppressor of bone marrow fibrosis

---

In the format provided by the authors and unedited

---

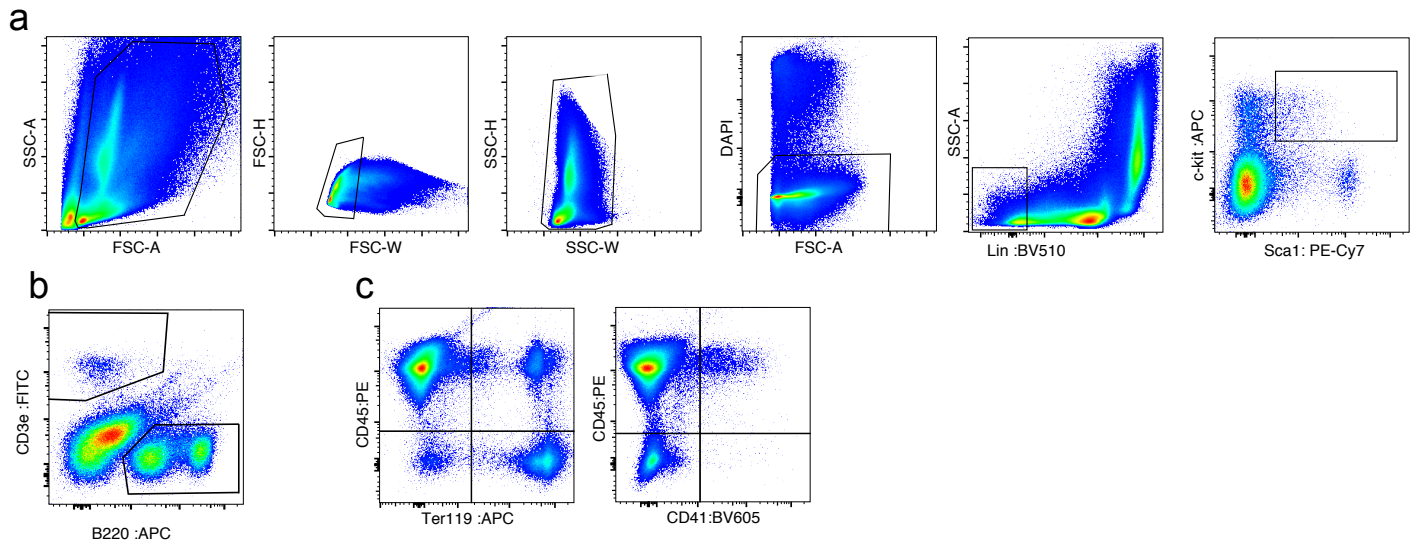

## Supplementary Figure 1

Representative gating strategy for the FACS LSK (a), CD3e+ and B220+ cells (b), CD45+, Ter119+, and CD41+ cells (c).

## Markers and settings for scRNA-seq analysis

**Supplementary Table 1.**

| Cell Identity                   | Marker Genes used                             |
|---------------------------------|-----------------------------------------------|
| Endothelial Cells               | Cdh5+, Emcn+, Vwf+, Prox1+                    |
| - mp-ECs                        | Nox4+ (specific to cKO), Ramp3+, Aplnr+       |
| - bm-ECs                        | Stab2+                                        |
| - a-ECs                         | Gja4+                                         |
| - al-ECs                        | Vwf+, Fmo2+, Tagln+, Aplnr+                   |
| BMSCs                           | Esm1+, Adipoq+, Kitl+, Pdgfrb+, Wif1+         |
| - mp-MS (Osteo-CAR)             | Postn+, Wif1+                                 |
| - bm-MS (Adipo-CAR)             | Adipoq+, Esm1+,                               |
| Osteoblastic Cells              | Bglap2+, Bglap3+, Car3+, Phex+                |
| Fibroblasts                     | Pdgfra+, Igfbp6+, Slurp1+, S100a4+, Sod3+     |
| SMCs                            | Pdgfrb+, Rgs5+, Myh11+, Acta2+                |
| - Myh11+ SMCs                   | Myh11+                                        |
| - Myh11- SMCs                   | Myh11-                                        |
| Chondrocytes                    | Prkg2+, Col9a1+, Sox9+, Acan+, Prg4+, Slurp1- |
| - Fibroblasts                   | Igfbp6+, Prg4+, Thbs4+, Slurp1+               |
| - Chondrocyte Progenitors       | Prg4+, Acan+, Slurp1-                         |
| - Columnar Chondrocytes         | Sfrp5+, Acan+, Thbs4+                         |
| - Pre-hypertrophic Chondrocytes | Acan+, Ihh-, Vegfa-                           |
| - Hypertrophic Chondrocytes     | Acan+, Ihh+ (early), Vegfa+ (late)            |
| Proliferating Cells             | Mki67+, Top2a+                                |

**Supplementary Table 2.**

| Cell Identities Subset       | Highly Variable Genes | Principle Components calculated | Leiden clustering resolution         | Second Passthrough? |
|------------------------------|-----------------------|---------------------------------|--------------------------------------|---------------------|
| Endothelial Cells            | 3000                  | 30                              | 0.5                                  | x                   |
| BMSC and Osteoblastic Cells  | 3000                  | 30                              | 0.1                                  | x                   |
| Chondrocytes                 | 4000                  | 40                              | 0.8                                  |                     |
| SMCs                         | 3000                  | 20                              | 0.2                                  |                     |
| Merging of all above Subsets | 3000                  | 50                              | - (annotations from subsetting kept) |                     |
| Merging of MSC & SMC Subsets | 3000                  | 40                              | - (annotations from subsetting kept) |                     |
